# Supplementary material for: Prevalence, risk and resilience factors of mental health conditions among female sex workers: a systematic review and meta-analysis
Source: Front Public Health. 2025 Jan 13;12:1455999. doi: 10.3389/fpubh.2024.1455999 (PMC11773154; doi:10.3389/fpubh.2024.1455999)
Supplement: Supplementary file 2 [file Table_2.XLSX]

## Sheet: Tabelle1
Exluded Study	Reason for Exclusion
Seib, C. 2009, The health of female sex workers from three industry sectors in Queensland, Australia	No standardized instruments
Ulibarri, M. 2011, Injection Drug Use as a Mediator Between Client-perpetrated Abuse and HIV Status Among Female Sex Workers in TwoMexico-US Border Cities	Secondary data analysis with data being already reported in a different publication
Parcesepe, A. M., 2016, The impact of an alcohol harm reduction intervention on interpersonal violence and engagement in sex work among female sex workers in Mombasa, Kenya: Results from a randomized controlled trial	Secondary data analysis with data being already reported in a different publication
Mc,Neece, C. A. , 2002, Program Closure: The Impact on Participants in a Program for Female Prostitutes	No instruments reported
Latkin, C. A., 2003, The relationship between social network characteristics and exchanging sex for drugs or money among drug users in Baltimore, MD, USA	No standardized instruments
Shannon, K, 2008, Mapping violence and policing as an environmental–structuralbarrier to health service and syringe availability amongsubstance-using women in street-level sex work	No standardized instruments
Burnette, M. L., 2008, Drug Dependence and Associated Risks AmongFemale Street-Based Sex Workers in the GreaterSydney Area, Australia	No standardized instruments
Burnette, M. L. 2008, Women’s Past-Year Prostitution Status and Receipt of Substance Abuse Treatment Services	No standardized instruments
Shannon, K, 2009 Drug sharing with clients as a risk marker for increased violence andsexual and drug-related harms among survival sex workers	No standardized instruments
Choi, H. 2009 Posttraumatic Stress Disorder (PTSD) and Disorders of Extreme Stress (DESNOS) Symptoms Following Prostitution and Childhood Abuse	Poor Quality (2 points on Newcastle Ottawa Scale)
Burnette, M. L. 2009 Impact of Substance-Use Disorder Treatment on Women Involved in Prostitution: Substance Use, Mental Health, and Prostitution One Year After Treatment	No standardized instruments
Landolt, K. 2011Psychische Erkrankungen bei Sexarbeiterinnen - Verbreitung und Einflussfaktoren	Secondary data analysis with data being already reported in a different publication
Go, V. F. 2011, High prevalence of forced sex among non-brothel based, wine shop centered sex workers in Chennai, India	No standardized instruments
Shannon, K. 2011, CRYSTAL METHAMPHETAMINE USE AMONG FEMALE STREET-BASED SEX WORKERS: MOVING BEYOND INDIVIDUAL-FOCUSED INTERVENTIONS	No standardized instruments
Goldenberg, S. M. 2012, Exploring the impact of underage sex work among female sexworkers in two Mexico-U.S. border cities	Secondary data analysis with data being already reported in a different publication
Ross, J. C. 2012, Age at Entry into Prostitution: Relationship to DrugUse, Race, Suicide, Education Level, ChildhoodAbuse, and Family Experiences	No standardized instruments
Roe-Sepowitz, D. E. 2012, The Impact of Abuse History and Trauma Symptoms on Successful Completion of a Prostitution-exiting Program	Poor Quality (2 points on Newcastle Ottawa Scale)
Cregan, C. 2013 The Effects of Age and Drug Dependency on the Emotional Exhaustion and Job Satisfaction of Adult Streetworkers in Australia	No standardized instruments
Chen, Y. 2013 Alcohol and sexual risk: An event–level analysis in commercial sex setting	Secondary data analysis with data being already reported in a different publication
Hail-Jares, K. 2016, Occupational and demographic factors associated with drug use among female sex workers at the China–Myanmar border	Secondary data analysis with data being already reported in a different publication
Shokoohi, M., 2018, Crystal methamphetamine use and its correlates in women engaged in sexwork in a developing country setting	No standardized instruments
Ranjbar, F. 2018, Mental health status among female sex workers in Tabriz, Iran	Poor Quality (2 points on Newcastle Ottawa Scale)
Cange, Charles W. 2019, Effects of traumatic events on sex workers’mental health andsuicide intentions in Burkina Faso: a trauma-informed approach	No standardized instruments
Shokoohi, M. 2019, Drug use patterns and associated factors among female sex workers in Iran	No standardized instruments
Perez-Figueroa, R. 2020 Drug use, sexual risk, and structural vulnerability among female sex workers in two urban centers of the Dominican Republic: The EPIC study	No standardized instruments
Schultz, T. 2020 Mental health needs and coping resources of participants in a prostitution pre-sentencing court program	Poor Quality (2 points on Newcastle Ottawa Scale)
Emanuel E. 2023 Adverse health outcomes among people who inject drugs who engaged in recent sex work: findings from a national survey	No standardized instruments
Nestadt D. 2023 Criminalization and coercion: sexual encounters with police among a longitudinal cohort of women who exchange sex in Baltimore, Maryland	No standardized instruments
Rock A. 2023 Relationships Between Stigma and Intimate Partner Violence Among Female Sex Workers Living With HIV: Social and Economic Exclusion	No standardized instruments
Mukherjee T. I. 2023 Association of gender-based violence with sexual and drug-related HIV risk among female sex workers who use drugs in Kazakhstan	No standardized instruments
Harris M. T, 2023, Association of sex work and social-structural factors with non-fatal overdose among women who use drugs in Vancouver, Canada	No standardized instruments
Jewkes R. 2023 Understanding drivers of female sex workers' experiences of external/enacted and internalised stigma: findings from a cross-sectional community-centric national study in South Africa	No standardized instruments
Rivera, A. V. 2021, Individual, Environmental, and Early Life Factors Associated With Client-Perpetrated Violence Among Women Who Exchange Sex in New York City	No standardized instruments
Meghan D 2013, Factors associated with pathways toward concurrentsex work and injection drug use among female sexworkers who inject drugs in northern Mexico	No standardized instruments
Zhao Q. 2017, Social Support and Amphetamine-type Stimulant Use among Female Sex Workers in China	No standardized instruments
Strathdee, S. A, 2008 Correlates of Injection Drug Use among Female Sex Workers inTwo Mexico-U.S. Border Cities	Secondary data analysis with data being already reported in a different publication
